# Supplementary material for: The iron chelator Deferasirox causes severe mitochondrial swelling without depolarization due to a specific effect on inner membrane permeability
Source: PubMed Central journal article supplement (PMC6994599; doi:10.1038/s41598-020-58386-9), 2020-01-31
Supplement: 41598_2020_58386_MOESM1_ESM.pdf [file 41598_2020_58386_MOESM1_ESM.pdf]

## **Supplementary Materials**

### **The iron chelator Deferasirox causes severe mitochondrial swelling without depolarization due to a specific effect on inner membrane permeability**

**Esther M Gottwald<sup>1</sup>, Claus D Schuh<sup>1</sup>, Patrick Drücker<sup>2</sup>, Dominik Haenni<sup>1,3</sup>, Adam Pearson<sup>1</sup>, Susan Ghazi<sup>1</sup>, Milica Bugarski<sup>1</sup>, Marcello Polesel<sup>1</sup>, Michael Duss<sup>4</sup>, Ehud M Landau<sup>4</sup>, Andres Kaech<sup>3</sup>, Urs Ziegler<sup>3</sup>, Anne KM Lundby<sup>5</sup>, Carsten Lundby<sup>5</sup>, Petra S Dittrich<sup>2</sup>, Andrew M Hall\*<sup>1,6</sup>.**

<sup>1</sup>Institute of Anatomy, University of Zurich, Switzerland. <sup>2</sup>Department of Biosystems Science and Engineering, ETH Zurich, Switzerland. <sup>3</sup>Center for Microscopy and Image Analysis, University of Zurich, Switzerland. <sup>4</sup>Department of Chemistry, University of Zurich, Switzerland. <sup>5</sup>Institute of Physiology, University of Zurich, Switzerland, <sup>6</sup>Department of Nephrology, University Hospital Zurich, Switzerland.

Correspondence to: [andrew.hall@uzh.ch](mailto:andrew.hall@uzh.ch)

**This file includes:**

Captions for Supplementary Movies 1 to 3

**Supplementary Movie 1.** Mobility of swollen GFP-labeled mitochondria (green) along microtubules (labeled with SiR tubulin, red) is reduced in cells after treatment for 40 minutes with DFX, in comparison to control cells (acquisition rate = 1 frame/5 seconds, scale = 10  $\mu\text{m}$ ).

**Supplementary Movie 2.** Co-imaging of mitochondrial morphology (with GFP labeling, green) and energization state (with TMRM, red) reveals that mitochondrial swelling induced by DFX reverses upon addition of Iron (III) (200  $\mu\text{M}$ ) (acquisition rate = 1 frame/10 seconds, scale = 10  $\mu\text{m}$ ).

**Supplementary Movie 3.** Giant IMM vesicles prepared in PBS containing 0.8 mg/ml pHrodo were trapped in a microfluidic chamber and incubated with PBS containing 0.8 mg/ml pHrodo and 1 mM DFX. DFX reaches the membrane at 35 seconds. Note the rise in intensity of membrane-bound pHrodo (red) and the vesicle deformation at the end. Scale = 10  $\mu\text{m}$ .
